# Supplementary material for: Effect of reduced z-axis scan coverage on diagnostic performance and radiation dose of neck computed tomography in patients with suspected cervical abscess
Source: PLoS One. 2017 Jul 5;12(7):e0180671. doi: 10.1371/journal.pone.0180671 (PMC5498060; doi:10.1371/journal.pone.0180671)
Supplement: S1 Table — (XLSX) [file pone.0180671.s001.xlsx]

## Sheet: CT_reduced
Patient	Brain (CT)	Breasts (CT)	Esophagus (CT)	Eye Lenses (CT)	Heart (CT)	Lungs (CT)	Red Marrow (CT)	Salivary Glands (CT)	ED_ICRP 103
1	2.344	1.556	6.05	1.893	2.246	7.164	4.599	2.344	3.825
2	1.72	0.443	4.181	1.474	0.705	2.523	2.878	1.01	2.282
3	2.314	0.786	5.546	2.242	1.258	4.708	3.759	2.314	2.895
4	1.544	0.0933	1.086	3.325	0.137	0.534	1.015	1.544	0.823
5	2.688	1.322	5.917	2.217	1.906	6.207	4.353	2.688	3.517
6	1.217	0.375	1.767	1.026	0.513	1.876	1.449	1.217	1.192
7	1.144	0.519	2.197	1.27	0.737	2.648	1.656	1.144	1.361
8	3.998	6.076	11.684	3.79	4.856	14.483	7.379	3.998	6.559
9	2.582	10.884	9.735	2.502	5.873	13.235	5.895	2.582	6.086
10	0.766	0.783	2.344	0.782	0.889	3.021	1.644	0.766	1.443
11	1.349	0.569	1.791	1.345	0.688	2.082	1.501	1.349	1.275
12	2.203	0.951	6.126	2.124	1.546	5.704	4.008	2.203	3.181
13	4.826	15.852	13.965	4.761	8.521	19.019	8.651	4.826	8.817
14	0.661	3.088	3.066	0.527	1.615	4.442	1.908	0.661	2.038
15	0.515	1.838	2.546	0.625	1.183	3.536	1.663	0.515	1.641
16	5.566	11.313	13.157	7.695	6.81	17.338	8.325	5.566	7.962
17	3.754	4.01	9.507	3.547	3.999	11.861	6.579	3.754	5.59
18	4.074	4.244	11.032	3.904	4.162	13.312	7.086	4.074	6.056
19	1.215	0.424	2.255	1.359	0.639	2.557	1.633	1.215	1.34
20	4.583	20.264	14.614	4.473	10.597	20.554	8.811	4.583	9.585
21	3.198	0.971	5.668	2.991	1.504	5.293	4.333	3.198	3.317
22	2.143	3.406	4.96	2.854	2.312	6.355	3.166	2.143	2.904
23	4.635	6.513	9.353	9.024	4.386	12.004	6.045	4.635	5.514
24	3.628		6.062	3.142	1.436	6.213	4.718	3.628	3.742
25	1.435		3.124	1.926	0.99	3.833	2.602	1.435	2.329
26	2.174		4.288	2.211	1.884	3.72	3.484	2.174	3.062
27	3.62		8.395	3.596	2.507	10.151	6.012	3.62	4.856
28	2.372		5.783	2.347	1.555	6.612	4.213	2.372	3.356
29	0.51		1.269	0.775	0.499	1.855	0.919	0.51	0.811
30	1.284		7.292	1.346	2.772	9.771	4.731	1.284	4.077
31	1.369		2.172	5.622	0.628	2.808	1.651	1.369	1.416
32	1.805		4.75	2.062	2.082	6.943	3.57	1.805	3.081
33	1.002		1.575	3.718	0.334	1.758	1.196	1.002	1.053
34	1.303		1.737	4.657	0.347	1.08	1.04	1.303	1.17
35	2.406		4.566	2.391	0.839	3.903	3.509	2.406	2.827
36	1.849		5.104	1.841	1.214	5.425	3.647	1.849	2.961
37	3.281		11.31	3.231	7.181	16.768	7.568	3.281	6.334
38	1.886		5.459	1.877	1.361	5.99	3.89	1.886	3.153
39	2.037		4.381	2.298	1.098	4.809	3.472	2.037	2.957
40	1.085		3.432	1.187	0.988	4.162	1.02	1.085	2.256
41	0.944		2.552	1.279	1.325	4	1.917	0.944	1.72
42	3.061		6.107	3.038	1.384	6.255	4.55	3.061	3.612
43	1.891		4.134	2.275	1.783	6.135	3.29	1.891	2.861
44	3.337		6.64	7.175	2.296	8.577	4.717	3.337	3.841
45	1.241		1.44	3.89	0.395	1.776	1.304	1.241	1.133
46	2.984		8.066	2.96	2.271	9.449	5.776	2.984	4.654
47	2.857		4.227	6.616	2.112	6.342	3.481	2.857	3.024
48	1.167		5.366	1.201	1.137	5.233	1.03	1.167	3.078
49	1.803		10.927	1.889	4.09	15.153	6.961	1.803	6.063
50	2.566		8.061	2.536	3.163	10.868	5.528	2.566	4.592
51	2.901		3.53	3.061	1.798	6.654	4.567	2.901	3.718

## Sheet: CT_standard
Patient	Brain (CT)	Breasts (CT)	Esophagus (CT)	Eye Lenses (CT)	Heart (CT)	Lungs (CT)	Red Marrow (CT)	Salivary Glands (CT)	ED_ICRP 103
1	19.361	1.576	6.02	41.07	2.259	7.221	6.088	19.361	4.481
2	15.251	0.461	4.233	31.245	0.715	2.569	4.11	15.251	2.812
3	16.461	0.801	5.577	30.636	1.265	4.742	4.865	16.461	3.402
4	3.273	0.0948	1.092	12.927	0.139	0.537	1.147	3.273	0.884
5	17.343	1.339	6.012	39.128	1.917	6.251	5.578	17.343	4.067
6	8.816	0.38	1.78	14.493	0.517	1.886	1.958	8.816	1.447
7	8.445	0.523	2.214	14.227	0.74	2.658	2.148	8.445	1.605
8	23.607	6.096	11.716	43.356	4.865	14.524	8.806	23.607	7.238
9	16.19	10.898	9.763	31.588	5.88	13.267	6.952	16.19	6.572
10	7.821	0.788	2.366	13.966	0.893	3.033	2.171	7.821	1.691
11	10.012	0.574	1.809	16.21	0.691	2.093	2.087	10.012	1.565
12	14.678	0.966	6.167	30.89	1.554	5.738	5.057	14.678	3.646
13	28.046	15.871	14.002	45.388	10.53	19.058	10.232	28.046	9.593
14	5.074	3.092	3.081	13.099	1.619	4.454	2.294	5.074	2.207
15	7.347	1.845	2.576	13.649	1.189	3.553	2.241	7.347	1.901
16	25.723	11.331	13.188	45.356	6.817	17.373	9.659	25.723	8.628
17	20.531	4.139	9.581	43.492	4.017	11.902	7.893	20.531	6.02
18	21.647	4.261	11.062	42.409	4.172	13.349	8.376	21.647	6.667
19	8.435	0.428	2.27	12.965	0.643	2.565	2.111	8.435	1.578
20	21.371	20.281	14.644	44.243	10.605	20.588	10.039	21.371	10.167
21	19.022	0.988	5.734	36.622	1.52	5.329	5.522	19.022	3.879
22	9.02	3.412	4.972	17.636	2.315	6.367	3.644	9.02	3.14
23	15.431	6.523	9.374	32.984	4.39	12.024	6.76	15.431	5.872
24	26.714		6.103	40.125	1.445	6.249	6.001	26.714	4.466
25	13.724		3.149	28.295	0.996	3.857	3.406	13.724	2.75
26	16.436		4.319	31.485	1.892	5.752	4.383	16.436	3.497
27	26.046		8.449	41.17	2.515	10.185	7.257	26.046	5.563
28	21.343		5.832	30.527	1.562	6.641	5.308	21.343	3.963
29	3.37		1.273	7.031	0.5	1.859	1.07	3.37	0.901
30	16.876		7.371	31.273	2.784	9.822	5.909	16.876	4.651
31	7.684		2.178	13.936	0.63	2.815	1.964	7.684	1.608
32	10.778		4.771	26.989	2.086	6.962	4.126	10.778	3.381
33	4.83		1.576	12.887	0.336	1.762	1.389	4.83	1.17
34	7.295		1.742	14.118	0.349	1.807	1.697	7.295	1.353
35	14.092		4.61	32.772	0.845	3.929	4.276	14.092	3.225
36	8.682		5.142	28.404	1.221	5.449	4.219	8.682	3.225
37	22.016		11.366	40.976	7.189	16.802	8.671	22.016	6.941
38	15.396		5.505	30.032	1.369	6.021	4.772	15.396	3.612
39	18.198		4.433	35.357	1.105	4.84	4.436	18.198	3.488
40	11.041		3.475	24.889	0.995	4.189	3.301	11.041	2.609
41	8.379		2.567	15.208	1.327	4.05	2.326	8.379	1.956
42	21.469		6.155	36.567	1.391	6.285	5.595	21.469	4.199
43	12.104		4.159	25.698	1.788	6.155	3.892	12.104	3.193
44	20.079		6.675	29.81	2.03	8.599	5.596	20.079	4.357
45	7.587		1.448	13.627	0.397	1.783	1.627	7.587	1.328
46	25.827		8.129	41.155	2.281	9.488	7.119	25.827	5.391
47	11.634		4.239	28.264	2.116	6.355	3.959	11.634	3.301
48	16.22		5.48	34.054	1.155	5.297	4.938	16.22	3.684
49	16.019		11.033	43.62	4.916	15.216	8.283	16.019	6.651
50	14.782		8.106	33.816	3.169	10.894	6.317	14.782	5.005
51	16.51		5.06	36.774	1.807	6.69	5.468	16.51	4.185
